# Supplementary material for: Sycp2 is essential for synaptonemal complex assembly, early meiotic recombination and homologous pairing in zebrafish spermatocytes
Source: PLoS Genet. 2020 Feb 24;16(2):e1008640. doi: 10.1371/journal.pgen.1008640 (PMC7062287; doi:10.1371/journal.pgen.1008640)
Supplement: S5 Table — (XLSX) [file pgen.1008640.s019.xlsx]

## Sheet: Figure1 RT-PCR
	bactin			sycp2
	Samples	MeanCp	STD Cp	Samples	MeanCp	STD Cp	Target/Ref	Mut/WT(ΔCT)	2^-(ΔΔCt)	average(ΔΔCt)	STD(ΔΔCt)
WT	A16, A17, A18	20.7553	0.0282956	A7, A8, A9	31.6048	0.645065	10.8494	0	1	1	0
	B16, B17, B18	20.4586	0.0215011	B7, B8, B9	28.5825	0.548172	8.12397	0	1
	C16, C17, C18	19.785	0.0185452	C7, C8, C9	25.1495	1.63716	5.36443	0	1
	D16, D17, D18	19.8328	0.0225324	D7, D8, D9	24.1568	0.419388	4.32401	0	1
	E16, E17, E18	19.4244	0.0918082	E7, E8, E9	24.4167	1.36527	4.99236	0	1
its	F16, F17, F18	20.1451	0.0170724	F7, F8, F9	31.5288	0.824145	11.3837	0.534326	0.690481	0.242519	0.260848
	G16, G17, G18	20.4571	0.0258018	G7, G8, G9	32.314	2.69095	11.8569	3.73295	0.0752088
	H16, H17, H18	20.0584	0.0872128	H7, H8, H9	27.3962	0.401353	7.33782	1.9734	0.254653
	I16, I17, I18	19.5213	0.0128441	I7, I8, I9	27.0055	0.31656	7.48419	3.16018	0.111864
	J16, J17, J18	19.7767	0.0244565	J7, J8, J9	28.4059	0.92923	8.62923	3.63687	0.0803884
sycp2KO	K16, K17, K18	20.2789	0.024157	K7, K8, K9	34.3761	0.386362	14.0972	3.24783	0.10527	0.0443566	0.0362819
	L16, L17, L18	20.4535	0.0177845	L7, L8, L9	34.0524	2.4472	13.599	5.47502	0.022483
	M16, M17, M18	19.0694	0.0179435	M7, M8, M9	28.7527	0.643711	9.68329	4.31886	0.0501064
	N16, N17, N18	19.6979	0.00636348	N7, N8, N9	29.8616	2.07097	10.1637	5.83967	0.0174616
	O16, O17, O18	21.4614	3.38408	O7, O8, O9	31.6937	1.71228	10.2323	5.23993	0.0264621

## Sheet: Figure4 and S6 telomere Sycp1
WT													its												sycp2KO
Cell ID	Stage	#TPA foci	#sycp1 frag.	w/0 TPA	w/1 TPA	w/pair of TPA	w/2 TPA	w/1 + pair of TPA	%nocoloc	%1coloc	%bothcoloc		Image	#TPA foci	#sycp1 frag.	w/0 TPA	w/1 TPA	w/pair of TPA	w/2 TPA	w/1 + pair of TPA	%nocoloc	%1coloc	%bothcoloc		Image	#TPA foci	#sycp1 frag.	w/0 TPA	w/1 TPA	w/pair of TPA	w/2 TPA	w/1 + pair of TPA	%nocoloc	%1coloc	%bothcoloc
wt_01	Z	55	50	0	48	1	1	0	2	96	2		its3_01	63	31	3	27	0	1	0	9.67742	87.0968	3.22581		ko6_01	112	16	10	6	0	0	0	62.5	37.5	0
wt_03	Z	47	51	1	45	2	3	0	5.88235	88.2353	5.88235		its3_03	50	30	2	27	0	1	0	6.66667	90	3.33333		ko6_02	101	20	13	7	0	0	0	65	35	0
wt_04	P	54	25	0	0	0	25	0	0	0	100		its3_06	69	21	2	19	0	0	0	9.52381	90.4762	0		ko6_03	94	11	6	3	0	2	0	54.5455	27.2727	18.1818
wt_06	Z	53	50	0	50	0	0	0	0	100	0		its3_07_1	74	27	7	13	0	7	0	25.9259	48.1481	25.9259		ko6_04	103	27	21	6	0	0	0	77.7778	22.2222	0
wt_10	Z-P	57	29	0	6	2	19	2	6.89655	27.5862	65.5172		its3_07_2	65	23	5	11	0	7	0	21.7391	47.8261	30.4348		ko6_06_2	71	25	18	7	0	0	0	72	28	0
wt_11	P	49	25	0	0	0	25	0	0	0	100		its3_09	70	24	1	15	3	5	0	16.6667	62.5	20.8333		ko6_06_3	64	24	22	2	0	0	0	91.6667	8.33333	0
wt_12	Z	46	50	0	48	0	2	0	0	96	4		its3_10	76	20	2	18	0	0	0	10	90	0		ko6_06	91	15	13	2	0	0	0	86.6667	13.3333	0
wt_15	Z	51	50	0	50	0	0	0	0	100	0		its3_12_2	63	23	1	22	0	0	0	4.34783	95.6522	0		ko6_09	107	14	5	8	0	1	0	35.7143	57.1429	7.14286
wt_17_2	Z-P	38	47	1	44	0	2	0	2.12766	93.617	4.25532		its3_12	62	21	0	21	0	0	0	0	100	0		ko6_10	94	12	4	7	0	1	0	33.3333	58.3333	8.33333
wt_17	Z	50	51	0	51	0	0	0	0	100	0		its3_15	73	18	0	16	0	2	0	0	88.8889	11.1111		ko6_13	97	20	12	7	1	0	0	65	35	0
wt_18	P	53	25	0	0	0	22	3	0	12	88		its3_16_2	79	18	2	16	0	0	0	11.1111	88.8889	0		ko6_17	95	17	15	1	1	0	0	94.1176	5.88235	0
wt_20	P	47	25	0	0	0	25	0	0	0	100		its3_16	65	17	3	14	0	0	0	17.6471	82.3529	0		ko6_18_2	117	15	7	8	0	0	0	46.6667	53.3333	0
wt_22	Z-P	57	46	0	41	0	5	0	0	89.1304	10.8696		its3_17	85	18	6	10	0	2	0	33.3333	55.5556	11.1111		ko6_18	100	15	12	3	0	0	0	80	20	0
wt_26	Z	51	50	0	50	0	0	0	0	100	0		its3_18_2	64	22	2	18	0	2	0	9.09091	81.8182	9.09091		ko6_20	79	19	14	5	0	0	0	73.6842	26.3158	0
wt_27	Z-P	54	33	0	16	0	17	0	0	48.4848	51.5152		its3_18	75	22	0	22	0	0	0	0	100	0		ko6_22_2	89	9	6	3	0	0	0	66.6667	33.3333	0
wt_28	Z-P	54	29	0	8	0	20	1	0	31.0345	68.9655		its3_20_2	59	16	2	9	0	5	0	12.5	56.25	31.25		ko6_22	91	23	16	7	0	0	0	69.5652	30.4348	0
wt_31	Z-P	54	39	0	29	0	10	0	0	74.359	25.641		its3_20	79	34	0	32	0	2	0	0	94.1176	5.88235		ko6_24_2	105	17	13	3	1	0	0	82.3529	17.6471	0
wt_33	P	50	25	0	0	0	25	0	0	0	100		its3_21	74	16	0	8	0	8	0	0	50	50		ko6_24	90	11	8	3	0	0	0	72.7273	27.2727	0
wt_34	Z	54	50	1	44	4	1	0	10	88	2		its3_22_2	78	25	5	5	0	15	0	20	20	60		ko6_25	60	12	12	0	0	0	0	100	0	0
wt_36	P	54	25	0	0	0	25	0	0	0	100		its3_22	63	18	2	11	0	5	0	11.1111	61.1111	27.7778		ko7_02	74	30	28	2	0	0	0	93.3333	6.66667	0
wt_37	P	54	25	0	0	0	25	0	0	0	100		its3_25	63	19	4	15	0	0	0	21.0526	78.9474	0		ko7_05	99	21	17	3	0	1	0	80.9524	14.2857	4.7619
wt_39	P	57	25	0	0	0	24	1	0	4	96		its4_01	82	27	6	15	0	6	0	22.2222	55.5556	22.2222		ko7_08	82	13	13	0	0	0	0	100	0	0
wt_40	P	50	25	0	0	0	25	0	0	0	100		its4_03	69	17	2	15	0	0	0	11.7647	88.2353	0		ko7_11	101	15	13	2	0	0	0	86.6667	13.3333	0
wt_42	P	53	25	0	0	0	25	0	0	0	100		its4_04	67	13	2	11	0	0	0	15.3846	84.6154	0		ko7_12	90	12	11	1	0	0	0	91.6667	8.33333	0
wt_44	P	53	25	0	0	0	23	2	0	8	92		its4_05	76	26	3	14	0	9	0	11.5385	53.8462	34.6154		ko7_13_2	103	11	7	4	0	0	0	63.6364	36.3636	0
wt_45	P	54	25	0	0	0	25	0	0	0	100		its4_06	63	21	2	12	1	6	0	14.2857	57.1429	28.5714		ko7_13	101	17	14	3	0	0	0	82.3529	17.6471	0
wt_48	P	53	25	0	0	0	25	0	0	0	100		its4_08_2	65	13	1	12	0	0	0	7.69231	92.3077	0		ko7_14	95	26	19	6	0	1	0	73.0769	23.0769	3.84615
wt_49	P	55	25	0	0	0	24	1	0	4	96		its4_08	69	16	0	16	0	0	0	0	100	0		ko7_16	100	18	17	1	0	0	0	94.4444	5.55556	0
wt_51	Z-P	41	47	0	47	0	0	0	0	100	0		its4_09_2	59	29	1	28	0	0	0	3.44828	96.5517	0		ko7_19_2	88	22	20	1	1	0	0	95.4545	4.54545	0
wt_53	P	53	25	0	0	0	23	2	0	8	92		its4_09	49	33	5	27	0	1	0	15.1515	81.8182	3.0303		ko7_19	94	14	8	5	0	1	0	57.1429	35.7143	7.14286
wt_54	Z-P	40	47	1	45	1	0	0	4.25532	95.7447	0		its4_10_2	54	21	2	19	0	0	0	9.52381	90.4762	0		ko7_21_2	54	12	12	0	0	0	0	100	0	0
wt_56	Z-P	42	43	4	38	1	0	0	11.6279	88.3721	0		its4_10	58	22	5	17	0	0	0	22.7273	77.2727	0		ko7_21	65	14	11	3	0	0	0	78.5714	21.4286	0
wt_58	P	50	25	0	0	0	23	2	0	8	92		its4_12_2	64	27	5	22	0	0	0	18.5185	81.4815	0		ko7_23_2	107	18	12	5	0	1	0	66.6667	27.7778	5.55556
wt_59	Z	51	50	0	47	0	3	0	0	94	6		its4_12	62	27	8	19	0	0	0	29.6296	70.3704	0		ko7_23	84	23	16	6	1	0	0	73.913	26.087	0
													its4_14	65	26	6	19	0	1	0	23.0769	73.0769	3.84615		ko7_24_2	80	10	10	0	0	0	0	100	0	0
													its4_17	70	27	5	20	0	2	0	18.5185	74.0741	7.40741		ko7_24_3	77	11	11	0	0	0	0	100	0	0
													its4_18	78	21	2	12	0	7	0	9.52381	57.1429	33.3333		ko7_24	95	13	9	4	0	0	0	69.2308	30.7692	0
													its4_19	77	24	2	19	0	3	0	8.33333	79.1667	12.5		ko7_25_2	121	12	11	1	0	0	0	91.6667	8.33333	0
													its4_22	76	22	2	20	0	0	0	9.09091	90.9091	0		ko7_25	96	17	13	3	0	1	0	76.4706	17.6471	5.88235
													its4_23	86	23	5	15	0	3	0	21.7391	65.2174	13.0435		ko7_26	112	9	3	5	0	1	0	33.3333	55.5556	11.1111
													its4_25	81	28	11	16	0	1	0	39.2857	57.1429	3.57143		ko7_28	90	10	8	2	0	0	0	80	20	0
																									ko7_29	113	12	8	1	0	2	1	66.6667	16.6667	16.6667
																									ko7_32	95	17	13	4	0	0	0	76.4706	23.5294	0
																									ko7_34	107	15	11	4	0	0	0	73.3333	26.6667	0
Upper whisker	57												Upper whisker	86											Upper whisker	121
3rd quartile	54												3rd quartile	76											3rd quartile	103
Median	53												Median	69											Median	95
1st quartile	50												1st quartile	63											1st quartile	88
Lower whisker	46												Lower whisker	49											Lower whisker	71
Nr. of data points	34												Nr. of data points	41											Nr. of data points	45

## Sheet: Figure5 BAC foci
WT								its-1								its-2								sycp2KO-1								sycp2KO-2
Cell ID	FociID	Area	XM	YM	Distance (µm)	On Sycp1		Cell ID	FociID	Area	XM	YM	Distance (µm)	On Sycp1		Cell ID	FociID	Area	XM	YM	Distance (µm)	On Sycp1		Cell ID	FociID	Area	XM	YM	Distance (µm)	On Sycp1		Cell ID	FociID	Area	XM	YM	Distance (µm)	On Sycp1
3	1	23	215.457	359.109	1.53198	no		1	1	162	123.951	107.735		no		1	1	84	229.095	206.155		no		1	1	175	140.237	420.197		yes		1	1	65	347.115	378.546	20.8771
3	2	107	203.883	361.977				2	2	177	341.534	317.72		no		4	1	68	360.838	277.294	12.553			2	1	223	180.451	349.33	13.6274			1	2	83	185.741	397.596
4	1	129	341.159	224.492	0	yes		3	1	120	308.55	183.958	9.61311			4	2	95	436.016	339.7				2	2	22	265.773	418.318	14.0971			2	1	124	175.798	188.387	18.3834
6	1	99	212.056	285.864	2.60566	yes		3	2	104	265.952	245.471				5	1	195	228.31	355.803		yes		2	3	50	255.92	423.86	1.45241			2	2	95	258.289	305.3
6	2	44	211.455	306.136				4	1	142	358.169	307.789	8.83105			5_2	1	195	228.31	355.803		yes		3	1	148	325.311	336.169	6.82375			4	1	63	291.008	166.77	15.9217
7	1	8	213.5	314	0.80795	yes		4	2	120	422.792	331.208				6	1	196	323.138	317.398		yes		3	2	113	340.925	386.934				4	5	106	280.915	290.283
7	2	29	211.362	319.914				5	3	134	165.075	308.709	3.16111			7	1	76	240.671	250.368	2.49425	yes		4	1	87	78.718	64.868	3.32506			5	1	145	245.438	285.417	8.95388
10	1	120	239.383	236.367	0	yes		5	5	111	187.329	319.203				7	2	106	256.802	261.17				4	2	79	84.386	90.12				5	2	99	311.298	308.207
13	3	99	113.955	352.561	0	yes		6	1	147	374.793	215.813		yes		9	1	68	350.353	308.676	2.76847	no		5	1	52	268.25	215.788	9.09087			6	1	33	314.409	186.288	4.24976
14	1	65	333.5	232.885	5.35002			7	1	77	362.825	306.37	23.9338			9	2	28	334.036	322.75				5	2	126	279.468	285.651				6	2	47	304.989	192.16	1.42615
14	2	59	351.958	270.212				7	2	20	211.6	307.55				10	1	75	286.98	182.633	15.3335			6	4	83	125.416	372.789	18.5909			6	3	93	338.683	208.758	4.8257
16	4	233	274.144	235.453	0	yes		7	3	16	203.5	308				10	2	10	335.5	217.7	7.69144			6	5	126	116.143	394.548	3.03884			7	1	52	337.442	256.808	1.11574	no
18	1	75	192.047	271.513	0	yes		7	4	52	186.192	310.442				10	3	81	327.315	294.957	9.98142			6	6	176	260.585	424.438	18.9509			7	2	127	352.626	262.154	2.0682
19	1	87	275.075	250.178	0	yes		7	5	58	372.31	318.362				12	2	57	150.833	272.728	3.50446			7	1	309	272.115	206.238	16.0125			7	3	16	330.625	262.188	2.82666
21	1	151	241.877	245.454	0	yes		8	1	46	309.087	139.913	16.2624			12	3	73	162.281	297.486				7	2	137	152.361	240.763				8	2	75	216.847	177.807	15.1526
22	1	125	124.22	190.868	3.46299			8	2	15	321.167	145.233				13	1	150	321.933	140.213	6.34388			8	2	79	333.12	185.677	12.8141			8	4	79	293.665	267.297
22	3	157	135.487	215.354				8	3	12	329.75	146.833				13	2	124	336.226	187.476				8	3	108	260.907	254.472				9	1	121	329.054	213.789	14.8086
23	2	257	304.387	318.613	0	yes		8	4	168	204.762	166.827				14	2	140	140.757	175.593		yes		9	1	250	184.42	321.592	17.1435			9	2	52	437.173	253.731
24	2	109	256.794	259.491	0	yes		9	1	113	188.031	288.049		yes		14_2	1	14	330.286	312.857	9.18114			9	2	205	317.607	329.72				10	1	79	185.677	216.804	15.8705
25	2	110	263.745	272.536	0	yes		10	2	72	215.194	166.736	18.9074			14_2	2	64	313.031	382.203				11	1	123	262.134	242.598	11.3888			10	3	117	186.252	340.329
28	1	293	295.852	184.558	0	yes		10	3	108	309.509	279.704				15	1	129	307.391	225.291		yes		11	2	101	306.153	319.54				11	1	88	194.943	190.67	10.581
30	3	252	231.631	345.238	0	yes		11	1	65	274.162	248.1	11.2103			16	1	293	319.708	217.363		yes		12	1	157	217.908	131.691	9.6626			11	3	119	247.929	253.718
32	1	236	221.992	216.987	0	yes		11	2	67	361.41	249.127				17	1	28	284.036	228.214	6.5989			12	2	123	289.451	154.882				12	1	137	255.142	169.186	4.42296
33	1	142	306.07	274.725	0	yes		12	1	55	311.245	151.173	13.6078			17	2	155	297.035	241.074	2.34927			13	1	93	183.629	202.661	19.0486			12	2	138	235.964	197.775
34	1	32	354.469	254.594	2.25315			12	2	94	224.234	211.564				17	3	42	243.357	259.571	7.29444			13	2	161	326.655	241.717				13	1	5	248.1	265.7	2.39503	no
34	2	61	370.123	262.5	8.92035			13	1	104	306.519	224	6.99031			18	1	41	226.768	248.402		no		14	2	96	312.646	220.115	11.8075			13	2	52	265.442	272.538
34	3	134	301.284	271.545	7.1718			13	2	10	275.5	268.7				19	1	117	239.124	137.406		yes		14	3	258	305.868	311.767				14	1	119	263.021	215.643	10.396
36	1	313	201.423	261.487	0	yes		14	2	177	263.607	324.517	4.87064			20	1	32	226.031	285.406	2.26617	yes		15	1	154	255.227	194.299	4.46502			14	2	150	224.893	287.013
37	1	215	207.305	285.928	0	yes		14	3	84	226.607	332.774				20	2	62	218.742	301.468				15	2	250	279.296	219.368				15	1	76	250.421	129.092	14.8998
38	1	96	292.458	171.75	9.86442			15	1	55	292.355	186.555	24.9377			21	1	89	251.309	147.949	11.2856			16	1	94	262.447	236.883	14.2621			15	2	89	317.028	224.028
38	2	187	242.281	229.864				15	2	25	218.22	365.94				21	2	111	337.545	164.662				16	2	70	220.457	339.643				16	1	128	269.5	187.578	6.32266
40	1	95	180.489	289.816	0	no		15	3	89	233.399	374.781	2.25686			22	1	60	267	243.5	15.8172			17	1	142	242.859	277.085	9.24743			16	3	133	233.898	221.553
41	1	140	239.929	286.179	0	yes		16	1	29	231.914	286.224	2.54724	yes		22	2	96	246.521	364.896				17	2	111	314.545	283.545				17	1	64	201.609	234.453	14.0257
44	1	89	246.208	290.298	2.67832	yes		16	2	126	229.27	297.421	1.47814			23	1	65	185.223	352.746	1.37 (1-2)			18	2	98	280.98	199.296	17.852			17	2	88	291.75	296.034
44	2	85	237.582	309.276				16	3	96	247.458	298.531	2.34112			23	2	30	180.133	362.133	5.8 (2-3)			18	4	147	295.929	337.439				18	1	133	245.034	261.365	7.68943
45	1	144	210.979	229.583	0	yes		17	2	151	167.149	128.334	17.4938			23	3	61	168.287	405.664	1.12 (3-4)			19	1	112	225.67	226.366	8.66185			18	2	77	213.721	312.37
46	2	210	353.352	255.795	0	yes		17	3	127	302.209	145.618				23	4	25	177.02	405.1	7.14 (1-3)			19	2	29	181.603	263.672	7.41805			19	1	38	168.816	218.711	10.1991
47	1	129	377.275	254.57	0	yes		18	2	153	241.618	329.585		yes		23					5.53 (2-4)			19	4	115	181.3	277.126	1.72899			19	2	44	162.545	231.568	1.83786
49	1	130	306.785	244.754	0	yes		19	1	69	175.094	283.457	21.1304			23					6.81 (1-4)			20	1	79	356.766	44.943	8.20197			19	3	83	172.572	298.006	8.63252
50	2	143	181.549	354.759	0	yes		19	2	59	336.653	314.246				24	1	116	275.759	154.793	8.18362			20	2	18	357.5	108.778				20	1	140	286.821	200.607	9.19037
53	1	167	320.123	218.308	0	yes		20	1	81	133.772	257.71	23.0494			24	2	176	274.034	218.466				21	1	183	235.183	258.937	7.66759			20	2	45	256.344	265.322
54	1	29	286.81	212.293	0	yes		20	2	44	292.068	342.136				25	3	325	341.032	261.091		yes		21	2	138	176.565	270.145				21	1	21	252.357	224.31	5.05474
55	1	193	296.391	203.806	0	yes		21	1	314	258.927	240.844		yes		26	1	141	251.55	203.493		yes		22	1	65	168.115	241.162	10.9778			21	2	43	218.872	244.965
								22	2	250	243.36	261.548	15.2688			27	1	204	300.77	361.941		yes		22	2	51	123.206	250.049	5.88173			24	1	48	332.104	192.042	5.9 (1-2)
								22	3	102	362.02	268.137				28	1	120	189.967	322.258		no		22	3	31	96.79	288.21	5.96294			24	2	77	288.474	206.11	11.4 (2-3)
								23	2	290	193.024	235.331		no		29	1	108	275.167	201.565	2.71966	yes		24	1	168	259.292	236.107	13.9609			24	3	79	210.437	248.411	11.4 (3-4)
								24	1	235	202.44	184.3		yes		29	2	135	283.915	220.841				24	2	242	317.826	327.657				24	4	46	281.522	302.152	17.2 (1-3)
								25	1	63	222.722	255.119	3.15647			30	1	59	288.517	237.737	10.5179			25	1	96	306.583	157.25	7.67062			24					12.4 (2-4)
								25	2	134	221.657	279.664				30	2	85	241.947	305.065				25	2	23	317.5	164.5	1.68372			24					15.6 (1-4)
								27	1	95	315.005	195.7	6.32527			31	1	86	254.663	259.442	8.86557			25	3	173	342.061	205.269	6.11503			25	1	90	207.7	241.056	14.7926
								27	2	96	267.167	207.333				31	2	22	308.591	281.682	7.49466			27	1	523	177.634	255.305		yes		25	2	86	319.535	268.43
								28	2	96	298.188	225.604		yes		31	3	50	317.12	288.78	1.42562			28	2	92	265.717	191.413	4.91766			26	1	86	306.209	273.663	8.0405
								29	2	64	184.078	237.641	13.1062			33	2	65	291.638	326.823	0	no		28	3	54	260.648	229.352				26	2	108	253.204	306.935
								29	3	316	297.066	262.035	14.851			34	2	166	298.729	227.301	0	yes		29	1	48	183.292	214.188	7.72895			28	1	83	290.898	330.102	6.18836
								29	4	51	280.578	270.716	2.39403			35	2	244	333.873	310.992	0	yes		29	2	77	164.097	271.201				28	2	65	242.962	334.808
								31	1	59	291.941	244.042	3.70965			37	1	269	351.901	253.831	0	yes		30	1	111	374.005	270.986	8.91541			30	1	99	282.924	273.126	5.32625
								31	2	48	286.917	271.667	3.60744											30	2	95	293.374	270.626	10.3595			30	2	157	313.131	301.519
								31	3	25	302.54	270.9	2.00964											30	3	158	305.354	281.101	2.04457			31	1	10	318	164.5	9.58371
								32	1	112	274.679	198.196		yes										31	1	137	167.741	259.792	23.1698			31	2	108	300.509	223.852	7.94969
								33	2	92	223.424	120.402	5.83961											31	2	144	234.715	314.083	11.0768			31	3	167	319.386	239.081	3.11614
								33	3	69	214.399	164.949												31	3	96	81.448	418.146	23.8015			33	1	177	230.398	223.263	5.93033
								34	1	66	244.712	219.455	1.7293	yes										32	1	167	215.123	196.32	5.58347			33	2	18	356	259.722	16.8033
								34	2	145	257.983	230.562	2.2234											32	2	225	200.62	237.287				33	3	86	238.407	268.721	15.1524
								34	3	15	240.1	232.1	2.30606											33	2	126	304.46	163.659	20.7894			34	1	22	289.591	246.409	5.12385
								35	1	70	251.2	311.786		yes										33	3	124	229.984	292.935	19.1683			34	2	71	296.838	268.655	3.00597
								36	2	85	190.853	288.065	16.0642											33	4	35	244.586	313.986	3.29157			34	3	175	283.129	285.763	2.81664
								36	3	71	297.768	352.894												34	1	153	311.559	269.376	17.694			35	1	78	262.282	233.013	2.28878	no
																								34	2	31	182.661	315.016	17.5681			35	2	103	266.015	250.432
																								34	3	78	187.256	328.667	1.85055
																								35	1	17	164.618	282.088	14.3657
																								35	2	162	175.185	296.673	2.31398
																								35	3	233	273.796	306.225	12.7287

## Sheet: Figure6 Dmc1 foci
WT					spo11KO					sycp2KO
Cell ID	Area	#particles	stage		Cell ID	Area	#particles			Cell ID	Area	#particles			WT-L	WT-EZ	WT-LZ	WT-P	spo11KO	sycp2KO
1_2	0.953	16	P		3_2	0	0			1_2	0	0		Upper whisker	6.96	10.3	6.19	1.17	0	0
1_3	3.282	53	LZ		3_3	0	0			1_3	0	0		3rd quartile	3.98	7.3	4.52	0.83	0	0
1_4	0.195	3	P		3_5	0	0			1_4	0.069	1		Median	2.4	6.04	2.23	0.33	0	0
1_5	0.528	8	P		3_9	0	0			1_7	0.023	1		1st quartile	1.43	4.84	0.46	0.06	0	0
1_6	3.775	31	EZ		3_11	0	0			1_8	0.092	1		Lower whisker	0.63	2.07	0.04	0	0	0
1_7	2.229	31	LZ		3_13	0	0			1_9	0	0		Nr. of data points	14	21	17	26	40	39
1_8	2.635	27	P		3_14	0	0			1_19	0.299	1
1_9	0.842	8	P		3_15	0.012	1			1_21	0.069	1
1_10	4.839	51	LZ		3_16	0	0			1_23	0	0
1_11	0.058	2	P		3_18	0	0			1_24	0	0
1_13	0.178	2	P		3_21	0	0			1_26	0	0
1_14	5.966	76	LZ		3_23	0	0			1_28	0	0
1_15	0	0	P		3_24	0	0			1_30	0	0
1_16	0.282	6	P		3_25	0	0			1_32	0.035	1
1_17	0.261	6	LZ		3_26	0	0			1_34	0	0
1_20	2.109	23	P		3_28	0	0			1_35	0	0
1_21	1.106	11	P		3_29	0	0			1_36	0	0
1_22	4.52	58	LZ		3_30	0	0			1_39	0	0
2_1	10.147	46	EZ		4_1	0	0			1_40	0	0
2_1-2	12.372	46	EZ		4_2	0	0			1_41	0	0
2_2	4.844	23	EZ		4_3	0	0			2_3	0	0
2_2-2	7.296	25	EZ		4_6	0	0			2_5	0	0
2_2-3	1.732	23	L		4_8	0	0			2_10	0	0
2_3	0.534	11	P		4_9	0	0			2_13	0	0
2_4	0.83	1	P		4_10	0	0			2_14	0	0
2_4-2	0.936	12	L		4_11	0	0			2_15	0	0
2_5	0.041	1	LZ		4_14	0	0			2_20	0	0
2_8	6.19	46	LZ		4_15	0.035	1			2_24	0	0
2_9	10.296	42	EZ		4_16	0	0			2_27	0	0
2_12	0.054	1	P		4_17	0	0			2_28	0	0
2_13	5.581	27	EZ		4_18	0	0			2_30	0	0
2_13-2	5.337	27	EZ		4_19	0	0			2_33	0	0
2_14	3.671	20	L		4_20	0	0			2_37	0	0
2_14-2	3.009	18	L		4_21	0	0			2_38	0	0
2_14-3	0.257	7	P		4_23	0.069	1			2_39	0	0
2_15	4.118	27	L		4_25	0.127	1			2_40	0	0
2_16	5.618	36	EZ		4_26	0	0			2_42	0	0
2_17	0.588	9	LZ		4_27	0	0			2_43	0	0
2_18	5.792	23	L		4_29	0	0			2_44	0	0
2_19	0	0	P		4_30	0	0
2_19-2	0.128	2	P
2_19-3	0.236	2	LZ
2_20	6.824	28	EZ
2_20-2	3.576	24	L
2_21	6.816	27	EZ
2_22	6.103	33	EZ
2_23	2.068	20	EZ
2_24	6.965	32	L
2_24-2	3.982	28	L
2_24-3	6.368	40	EZ
2_25	6.165	36	LZ
2_26	2.258	32	LZ
2_27	2.842	27	EZ
2_28	0.609	9	P
2_29	7.439	23	EZ
2_29-2	2.917	31	LZ
2_30	0.236	3	P
2_30-2	0	0	P
2_31	3.903	16	EZ
2_31-2	6.045	39	EZ
2_32	5.25	37	EZ
2_33	1.743	21	LZ
2_34	0.377	9	P
2_35	7.504	25	EZ
2_36	1.786	18	L
2_36-2	1.434	17	L
2_37	0.389	7	P
2_38	0.008	1	P
2_39	1.902	22	LZ
2_40	0.746	12	L
2_42	0.22	5	LZ
2_43	0.05	1	P
2_43-2	0.456	8	LZ
2_44	1.446	15	L
2_45	0.63	9	L
2_47	1.168	11	P
2_48	0.572	8	P
2_49	2.333	23	EZ

## Sheet: S11 Dmc1 foci IR
WT no IR				WT 10Gy				spo11KO no IR			spo11KO 10Gy			sycp2KO no IR			sycp2KO 10Gy
Cell ID	Area	stage		Cell ID	Area	stage		Cell ID	Area		Cell ID	Area		Cell ID	Area		Cell ID	Area
1_1	0.845	P		1_1	1.284	LZ		1_2	0.804		1_3	0.394		1_2	0.816		1_1	1.844				L.noIR	L.10Gy	EZ.noIR	EZ.10Gy	LZ.noIR	LZ.10Gy	P.noIR	P.10Gy	spo11KO.noIR	spo11KO.10Gy	sycp2KO.noIR	sycp2KO.10Gy
1_2	1.666	P		1_2	1.077	P		1_6	0.692		1_4	1.492		1_4	0.075		1_3	0.791			Upper whisker	7.92	9.08	11.95	9.08	2.35	3.27	1.67	2.54	1.38	3.26	1.09	2.87
1_3	1.496	P		1_3	0.878	P		1_7	0.203		1_5	0.385		1_6	0.932		1_4	1.695			3rd quartile	5.89	6.14	7.1	5.09	1.16	2.04	0.91	1.59	0.63	1.75	0.55	1.62
1_4	0.568	P		1_4	1.624	P		1_9	0.356		1_6	1.844		1_7	0.369		1_5	0.522			Median	1.81	3.83	3.25	2.31	0.69	1.67	0.56	1.15	0.28	1.15	0.37	1.25
1_5	0.68	LZ		1_6	7.636	L		1_10	0.079		1_7	2.987		1_8	0.166		1_6	1.91			1st quartile	0.92	1.97	1.53	1.86	0.33	1.07	0.37	0.83	0.11	0.59	0.17	0.7
1_6	1.69	L		1_7	2.544	P		1_12	2.921		1_8	0.307		1_10	2.117		1_7	0.978			Lower whisker	0.32	0.75	0.63	0.66	0.13	0.48	0	0.01	0	0.1	0	0.25
1_7	0.725	L		1_8	1.4	LZ		1_13	0.253		1_9	1.21		1_11	1.197		1_8	0.721			Nr. of data points	17	12	36	19	51	20	41	28	50	59	48	64
1_7_2	2.768	EZ		1_9	1.798	LZ		1_14	0.273		1_12	0.485		1_12	0.104		1_9	0.418			Average/Mean	3.198	4.22	4.523	4.001	0.841	1.697	0.709	1.191	0.506	1.389	0.516	1.254
1_8	5.49	EZ		1_10	1.28	P		1_18	0.108		1_13	0.912		1_13	0.149		1_11	1.769
1_9	1.264	LZ		1_11	1.09	P		1_22	1.16		1_14	0.104		1_14	0.501		1_15	1.065
1_10	1.889	LZ		1_12	3.029	LZ		1_23	0.501		1_15	1.181		1_16	0.253		1_16	2.32
1_11	0.373	P		1_13	1.119	P		1_24	0.207		1_16	1.583		1_18	0.017		1_17	0.551
1_12	3.215	EZ		1_14	1.181	P		1_24_2	0		1_17	2.544		1_20	0.116		1_18	1.384
1_13	0.783	P		1_15	5.502	EZ		1_25	0.141		1_22	0.825		1_23	0.41		1_20	0.688
1_14	1.003	LZ		1_16	0.659	LZ		1_25_2	0.153		1_26	1.711		1_25	1.761		1_21	1.396
1_14_2	1.376	LZ		1_17	0.891	P		1_26	0.394		1_27	1.521		1_27	0.547		1_22	1.475
1_15	4.761	EZ		1_18	1.55	LZ		1_27	0.058		1_28	1.044		1_28	1.421		1_24	1.38
1_16	2.204	EZ		1_19	1.504	P		1_29	0.195		1_30	0.319		1_29	0.696		1_25	2.561
1_17	0.418	P		1_20	3.273	LZ		1_30	0.833		1_30	1.355		1_31	0.717		1_31	0.443
1_18	0.166	LZ		1_21	11.804	EZ		1_32	0.439		1_31	2.242		1_32	1.09		1_32	0.456
1_19	1.893	LZ		1_22	4.674	EZ		1_34	1.297		1_32	1.251		1_33	0.547		1_33	1.355
1_19_2	2.507	LZ		1_23	1.338	P		2_3	2.975		1_35	1.711		2_2	0.505		1_34	0.883
1_20	0.684	LZ		1_24	1.094	LZ		2_4	1.719		1_36	5.076		2_5	0.083		1_35	1.835
1_21	1.028	LZ		1_24_2	0.783	LZ		2_5	0.286		1_37	2.204		2_5_2	0.232		2_3	1.243
1_22	0.017	P		1_25	2.047	P		2_6	0.124		1_38	0.481		2_6	0.394		2_5	0.315
1_23	1.728	LZ		1_26	1.061	P		2_7	0.029		1_39	1.148		2_7	0.356		2_11	1.74
1_24	0.373	P		1_27	3.153	LZ		2_8	0.331		1_39_2	1.417		2_8	0.555		2_16	3.447
1_25	4.164	EZ		1_28	1.885	EZ		2_9	0.555		2_1	0.634		2_9	0.423		2_23	1.11
1_25_2	6.613	L		1_29	0.485	LZ		2_10	0.265		2_4	0.704		2_12	0.199		2_25	0.717
1_26	0.597	P		1_30	1.935	EZ		2_11	0.468		2_7	0.319		2_14	0.307		2_27	1.496
1_27	0.53	P		1_31	2.507	LZ		2_12	0.733		2_8	0.22		2_16	0.34		2_30	1.562
1_28	0.874	L		1_32	2.026	P		2_13	0.97		2_9	1.023		2_18	0.174		2_33	1.487
1_28_2	1.421	EZ		1_33	1.558	P		2_14	1.384		2_13	0.99		2_20	0.162		2_35	1.04
1_29	2.349	EZ		1_34	1.367	P		2_15	0.104		2_14	0.609		2_21	0.257		2_36	0.601
1_30	1.135	P		1_35	5.672	L		2_16	0.568		2_15	1.081		2_21_2	0		2_37	0.634
1_31	5.892	L		1_36	6.6	L		2_17	0.083		2_18	0.907		2_22	0.418		2_38	0.249
1_31_2	6.285	L		1_37	2.204	L		2_21	0.286		2_19	4.094		2_24	0.104		2_39	0.278
1_32	0.721	P		1_37_2	2.465	L		2_23	0.439		2_19_2	1.703		2_25	0.373		2_40	1.276
1_33	1.168	P		1_38	2.109	EZ		2_24	0.63		2_20	0.539		2_27	0.547		2_41	0.331
1_34	7.922	L		1_38_2	3.203	EZ		2_25	0.112		2_21	3.261		2_29	0.062		2_44	1.55
1_35	0.895	EZ		1_39	1.661	EZ		2_26_2	0.066		2_23	1.479		2_29_2	0.099		2_44_2	0.352
1_36	0.907	P		1_41	9.045	EZ		2_27	0.447		2_24	2.271		2_30_2	0.497		2_45	1.135
1_37	1.446	LZ		1_42	8.063	EZ		2_28	0.091		2_25	1.798		2_31	0.228		2_46	1.098
1_38	2.643	EZ		2_1	2.005	P		2_29	0.095		2_26	0.58		2_34	0.514		2_47	1.728
2_1	1.409	P		2_2	0.323	P		2_30	0.021		2_27	2.188		2_34_2	0.307		2_48	1.392
2_2	0.642	P		2_3	1.326	L		2_30_2	0		2_28	1.91		2_35	0.514		2_49	1.62
2_3	0.211	LZ		2_3_2	0.75	L		2_32	0.921		2_29	0.555		2_35_2	0.166		2_51	2.399
2_3_2	2.005	EZ		2_4	1.715	LZ		2_33	0.207		2_30	0.236		2_39	0.895		2_52	1.156
2_4	0.29	LZ		2_5	1.848	LZ		2_36	0.253		2_31	0.398					2_53	0.866
2_4_2	0.381	LZ		2_6	9.078	L		2_37	0.062		2_32	1.55					2_53_2	1.102
2_5	0.551	LZ		2_7	9.078	EZ					2_33	2.888					2_55	1.26
2_6	0.912	LZ		2_9	1.873	LZ					2_34	3.509					2_56	1.616
2_7	1.442	EZ		2_10	1.073	P					2_35	1.086					2_58_2	0.501
2_7_2	1.156	EZ		2_11	5.515	L					2_38	1.55					2_59	2.088
2_8	1.251	LZ		2_12	0.269	P					2_39	0.965					2_60	2.788
2_9	0.228	LZ		2_13	0.659	EZ					2_41	2.975					2_61	0.597
2_10	0.982	LZ		2_14	3.398	EZ					2_42	1.073					2_62	2.871
2_11	1.417	EZ		2_16	4.4	EZ					2_42_2	0.725					2_64	1.04
2_12	0.05	P		2_16_2	4.214	L					2_43	0.381					2_64_2	1.405
2_13	0.319	L		2_17	0.385	P											2_65	0.936
2_13_2	0.41	L		2_18	1.732	L											2_66	1.657
2_14	1.537	P		2_19	1.289	P											2_67	0.388
2_15	0.791	P		2_20	1.048	LZ											2_69	1.28
3_1	8.44	EZ		2_21	1.91	P											2_70	1.454
3_2	8.1	EZ		2_22	1.152	EZ
3_3	0.51	P		2_23	0.758	LZ
3_4	1.197	LZ		2_25	1.719	P
3_4_2	2.022	LZ		2_26	0.443	P
3_5	0.522	P		2_27	0.775	P
3_6	11.953	EZ		2_29	2.308	EZ
3_7	0.729	LZ		2_29_2	1.835	EZ
3_8	0.688	LZ		2_30	0.008	P
3_9	7.437	EZ		2_31	3.442	L
3_10	0.675	LZ		2_32	1.852	LZ
3_11	0.195	LZ		2_33	2.192	EZ
3_12	6.53	EZ		2_33_2	1.119	EZ
3_13	1.715	L		2_34	2.204	LZ
3_14	0.282	P		2_34_2	1.624	LZ
3_15	0.916	L		2_35	0.576	P
3_16	8.013	EZ
3_17	0.464	P
3_18	9.327	EZ
3_19	2.851	EZ
3_20	1.173	P
3_21	0.974	EZ
3_21_2	0	P
3_22	1.45	LZ
3_23	0.638	LZ
3_24	1.815	L
3_24_2	2.884	L
3_24_3	3.866	L
3_25	3.103	EZ
3_26	1.115	LZ
3_27	0.323	LZ
3_28	0.505	LZ
3_29	1.425	LZ
3_30	2.718	P
3_30_2	2.159	P
3_34	1.16	EZ
3_36	0.128	LZ
3_37	2.345	LZ
3_38	0.215	P
3_39	0.41	LZ
3_41	1.098	LZ
3_42	0.849	LZ
3_43	0.149	P
3_44	0.381	P
3_45	0.696	P
3_46	8.137	EZ
3_47	0.866	EZ
3_48	0.273	LZ
3_49	0.186	LZ
3_51	0.481	LZ
3_53	5.834	EZ
3_54	0.932	LZ
3_55	0.626	EZ
3_56	1.627	EZ
3_57	0.389	LZ
3_58	0.133	LZ
3_59	6.762	EZ
3_60	0.211	P
3_61	0.559	P
3_62	0.253	P
3_63	0.336	LZ
3_63_2	0.199	LZ
3_64	3.174	L
3_64_2	0.24	LZ
3_65	11.34	EZ
3_66	0.398	P
3_67	0.377	P
3_68	0.331	LZ
3_69	0	P
3_70	0.742	LZ
3_71	0.907	LZ
3_72	5.129	EZ
3_73	3.29	EZ
3_74	0.945	P
3_75	7.847	L
3_76	5.482	EZ
3_77	1.421	L
3_78	0.331	P
3_79	9.923	EZ
3_80	0.667	LZ
3_81	0.854	LZ
3_82	0.199	LZ
